# Supplementary material for: A Multi-Level Iterative Bi-Clustering Method for Discovering miRNA Co-regulation Network of Abiotic Stress Tolerance in Soybeans
Source: Front Plant Sci. 2022 Apr 7;13:860791. doi: 10.3389/fpls.2022.860791 (PMC9021755; doi:10.3389/fpls.2022.860791)
Supplement: Supplementary Table 1 — Summary of ATH, GMA, and MTR MTIs sources. [file Table_1.XLSX]

## Sheet: Sheet1
Summary of ATH MTIs sources
	ATH
	Source	Numbers
Database	TarBase	43
	Starbase	66212
	DPMIND	4682
	miRTarBase	106
Article	PMID:24336445	2
	PMID:22759612	142
	PMID:18542052	111
	PMID:18472421	59
	DOI:10.1007/s11	55
	104-018-3697-3
total	71412
Remove dup	59318
